# Supplementary material for: Histone Deacetylase Inhibitor Suberoylanilide Hydroxamic Acid Improves Energetic Status and Cardiomyogenic Differentiation of Human Dilated Myocardium-Derived Primary Mesenchymal Cells
Source: PubMed Central journal article supplement (PMC7402340; doi:10.3390/ijms21144845), 2020-07-08
Supplement: ijms-21-04845-s001.pdf [file ijms-21-04845-s001.pdf]

# Histone Deacetylase Inhibitor Suberoylanilide Hydroxamic Acid Improves Energetic Status and Cardiomyogenic Differentiation of Human Dilated Myocardium-Derived Primary Mesenchymal Cells

Rokas Miksiunas <sup>1</sup>, Kestutis Rucinskas <sup>2</sup>, Vilius Janauskas <sup>2</sup>, Siegfried Labeit <sup>3,4</sup> and Daiva Bironaite <sup>1,\*</sup>

Figure S1

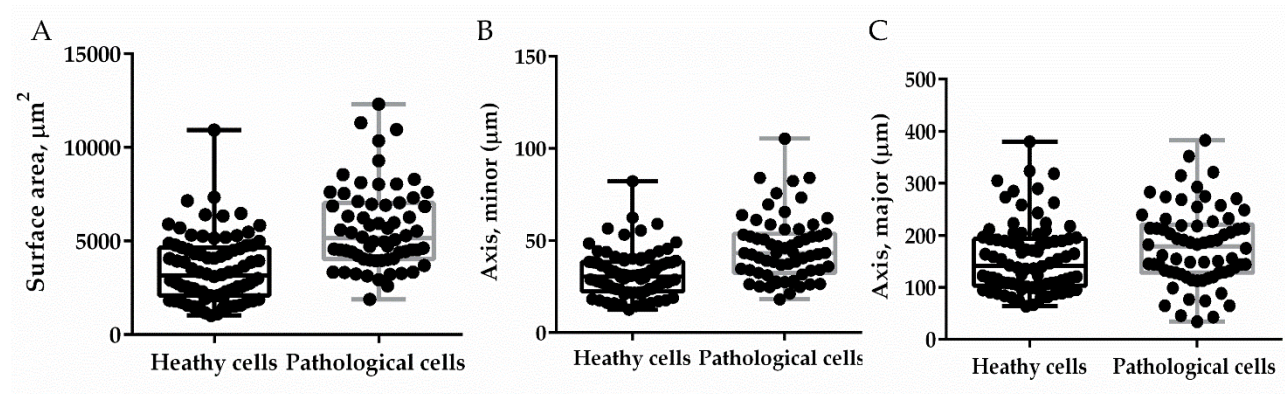

Figure S1. Graphical representation of total attachment area, minor and major cell axes of all healthy and pathological hmMSCs. A. Attachment area of healthy and pathological cell; B. Length of minor axes of the healthy and pathological hmMSC; C. Length of major axes of the healthy and pathological hmMSC. The distribution of 60 cells of each type are presented. Data are presented as mean  $\pm$  SD.

Figure S2

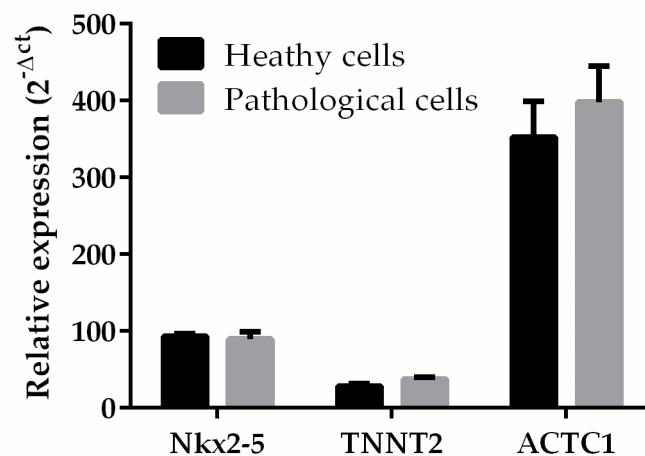

Figure S2. Expression of Nkx2-5, TNNT2 and ACTC1 at control levels. Gene expressions were normalized to average of housekeeping genes ACTB and GAPDH using 2<sup>-ΔCT</sup> method. Data are presented as mean  $\pm$  SD.
